# Supplementary material for: Effects of Dietary Multienzyme Complex Supplementation on Growth Performance, Digestive Capacity, Histomorphology, Blood Metabolites and Hepatic Glycometabolism in Snakehead (Channa argus)
Source: MDPI journal article supplement (doi:10.3390/ani12030380), 2022-02-04
Supplement: s1 [file s1]

**Supplementary Table S1.** Primers used for real -time PCR analysis of snakehead mRNAs

| Gene                        | Forward Primer (5'-3')   | Reverse Primer (3'-5')    | Amplicon Length (bp) |
|-----------------------------|--------------------------|---------------------------|----------------------|
| Pepsinogen A                | GTCTGGCCTTCCAGAGTATTG    | GCTGCTAAGGTAGACAGAGAAC    | 107                  |
| Trypsinogen                 | GCTCTGTTCGCAGTGGCATT     | GCACTCATAGCCTCCGACAATCT   | 72                   |
| Amylase                     | CCAGTGTCCCCTATTCCAGTTTG  | CTGGCATCACCGTAGTTCTCAAT   | 85                   |
| Hexokinase                  | ACTCGTCTCCCTCTGGGCTTCACC | CCCTCAACAGTCCCACCACATCTT  | 135                  |
| Fructose1, 6-Bisphosphatase | GGGAAAGCTGCGACTCCTGTATGA | CCGTCTCACTTCTGGGCATGTCTC  | 203                  |
| Glucose-6-phosphatase       | CCCTCTTGTGGCTGAGATGTTTGG | G TTCAGCCAGTCTCCAATCACAGC | 234                  |
| Glycogen synthase           | ACCAGCTCACTTCCTTCCTGTTCC | GGCACAGAGGCTGGTCGAGGGTAA  | 234                  |
| 18 S                        | CCCAATATTTCAAACCCAGTCTGT | CCACCGCTAAGAGTTGTCACAGTT  | 91                   |

**Supplementary Table S2.** Identification of significantly different metabolites between MEC added and control snakeheads.

| Metabolites                | RT    | Mass | VIP   | P Value | FC     |
|----------------------------|-------|------|-------|---------|--------|
| E1 to Control              |       |      |       |         |        |
| 21-hydroxypregnenolone     | 6.730 | 91   | 2.664 | 0.016   | 0.403  |
| Norleucine                 | 8.488 | 86   | 2.073 | 0.039   | 2.829  |
| Dithioerythritol           | 8.583 | 73   | 1.097 | <0.001  | 2.003  |
| uric acid                  | 9.353 | 171  | 1.023 | 0.012   | 1.883  |
| 4-hydroxyphenylacetic acid | 9.665 | 179  | 1.230 | <0.001  | 0.443  |
| Indolelactate              | 9.761 | 130  | 3.344 | 0.008   | 0.101  |
| Proline                    | 10.20 | 142  | 1.017 | 0.011   | 1.997  |
| Glycine                    | 10.28 | 174  | 1.114 | <0.001  | 1.869  |
| N-Methyl-L-glutamic acid   | 11.72 | 172  | 2.241 | 0.047   | 2.152  |
| 3-hydroxy-L-proline        | 12.47 | 68   | 1.263 | <0.001  | 2.312  |
| aspartic acid              | 13.03 | 232  | 1.062 | 0.002   | 1.872  |
| D-alanyl-D-alanine         | 14.41 | 188  | 1.268 | 0.005   | 2.336  |
| Taurine                    | 15.43 | 326  | 1.147 | <0.001  | 1.881  |
| D-(glycerol-phosphate)     | 16.67 | 299  | 1.171 | 0.008   | 2.302  |
| Sorbose                    | 18.52 | 103  | 1.078 | 0.014   | 0.557  |
| E2 to Control              |       |      |       |         |        |
| 5,6-dihydrouacil           | 6.55  | 171  | 3.201 | 0.019   | <0.001 |
| Dithioerythritol           | 8.583 | 73   | 1.024 | <0.001  | 1.996  |
| 4-hydroxyphenylacetic acid | 9.665 | 179  | 1.359 | <0.001  | 0.392  |
| Proline                    | 10.20 | 142  | 1.074 | 0.002   | 1.853  |
| Glycine                    | 10.28 | 174  | 1.014 | 0.002   | 1.731  |
| Carbazole                  | 11.36 | 113  | 2.636 | 0.035   | 2.882  |
| N-Methyl-L-glutamic acid   | 11.72 | 172  | 2.305 | 0.049   | 2.073  |
| Aminomalonic acid          | 12.35 | 218  | 1.058 | 0.034   | 2.598  |
| Phloroglucinol             | 14.82 | 342  | 3.486 | 0.001   | 3.612  |
| Taurine                    | 15.43 | 326  | 1.121 | <0.001  | 1.872  |
| Glucuheptonic acid         | 16.11 | 73   | 1.073 | <0.001  | 0.582  |
| Sorbose                    | 18.52 | 103  | 1.797 | <0.001  | 0.217  |
| Mannose                    | 19.36 | 205  | 1.034 | 0.042   | 0.680  |

|                             |       |     |       |        |        |
|-----------------------------|-------|-----|-------|--------|--------|
| uric acid                   | 22.17 | 441 | 1.152 | 0.007  | 1.786  |
| Pipecolinic acid            | 23.12 | 156 | 2.258 | 0.030  | 0.219  |
| beta-Glycerophosphoric acid | 23.34 | 73  | 1.067 | <0.001 | 1.770  |
| Glutaric Acid               | 27.05 | 116 | 2.332 | 0.019  | 0.471  |
| E3 to Control               |       |     |       |        |        |
| Dithioerythritol            | 8.583 | 73  | 1.281 | <0.001 | 2.178  |
| 4-hydroxyphenylacetic acid  | 9.665 | 179 | 1.446 | <0.001 | 0.343  |
| Proline                     | 10.20 | 142 | 1.065 | 0.011  | 1.882  |
| Glycine                     | 10.28 | 174 | 1.068 | <0.001 | 1.807  |
| Dihydroxyacetone            | 12.20 | 103 | 4.039 | <0.001 | <0.001 |
| L-homoserine                | 14.15 | 146 | 2.597 | 0.039  | 0.341  |
| Phloroglucinol              | 14.82 | 342 | 3.701 | <0.001 | 5.294  |
| Taurine                     | 15.43 | 326 | 1.214 | <0.001 | 1.884  |
| citric acid                 | 17.66 | 273 | 1.126 | <0.001 | 0.521  |
| Sorbose                     | 18.52 | 103 | 1.932 | <0.001 | 0.148  |
| Uric acid                   | 22.17 | 441 | 1.218 | 0.005  | 1.864  |
| Pipecolinic acid            | 23.12 | 156 | 3.638 | <0.001 | 0.066  |
| Guanosine                   | 28.71 | 73  | 1.254 | <0.001 | 0.421  |
| Gentiobiose                 | 30.12 | 73  | 1.210 | <0.001 | 0.466  |

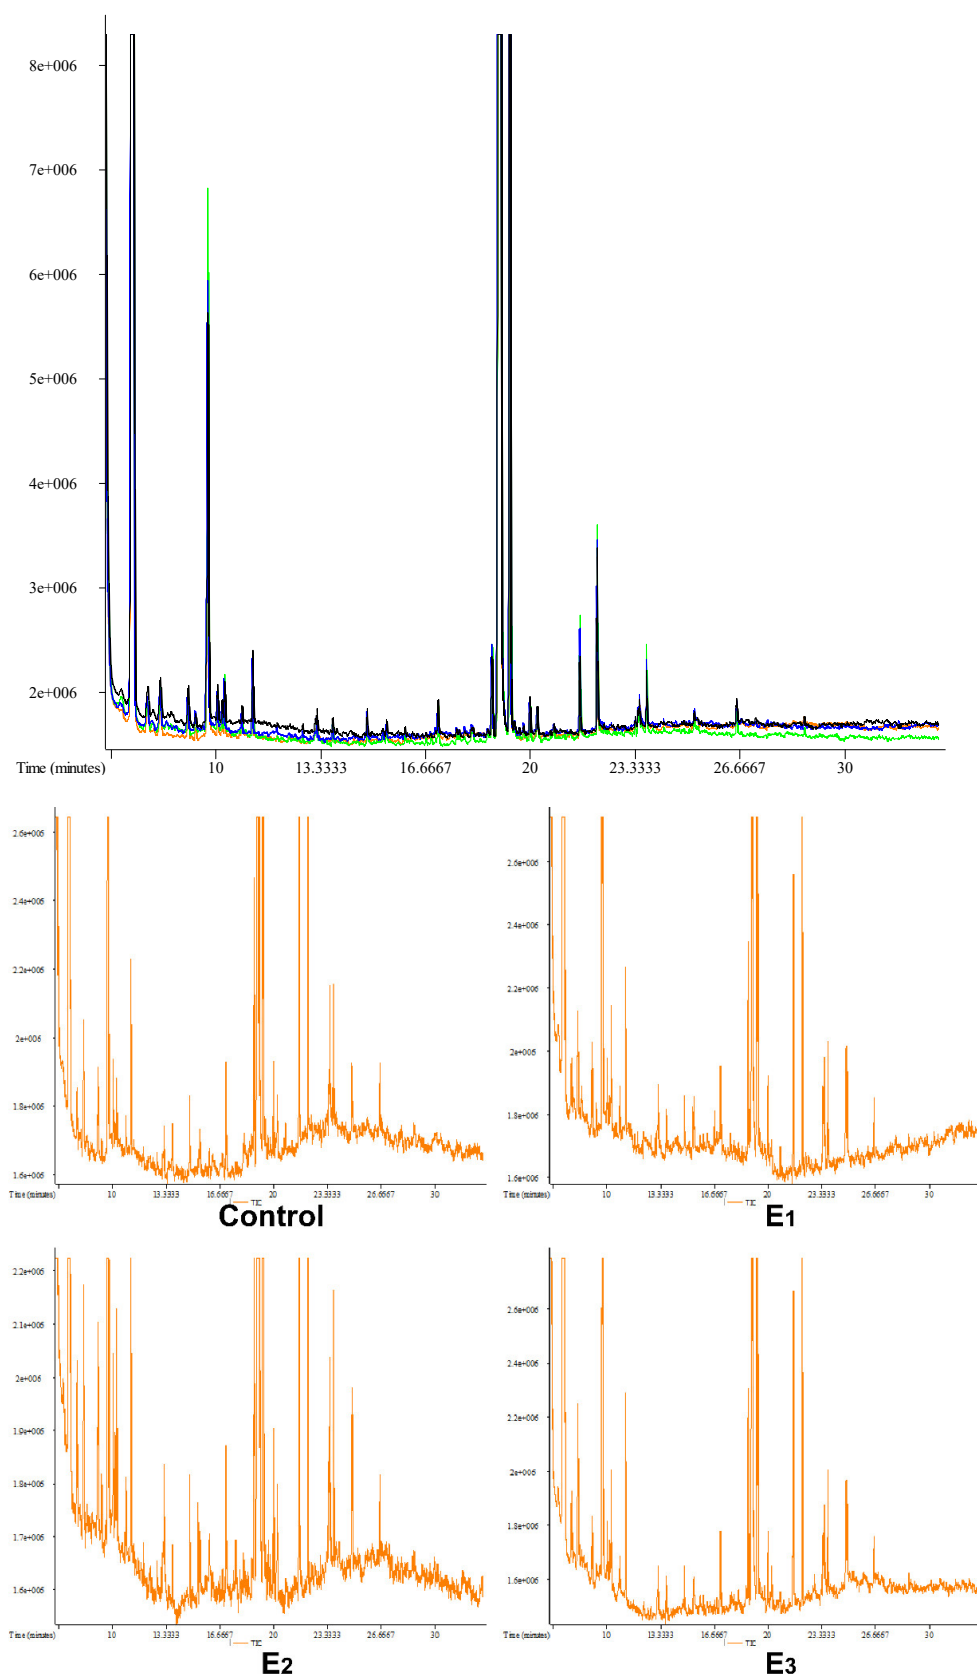

**Figure S1.** Typical total ion chromatograms (TIC) of the four experimental groups obtained from GC- TOF/MS analysis.
